# Supplementary material for: Efficient hydrolytic cleavage of plasmid DNA by chloro-cobalt(ii) complexes based on sterically hindered pyridyl tripod tetraamine ligands: synthesis, crystal structure and DNA cleavage
Source: Royal Society of Chemistry journal article supplement (doi:10.1039/c4dt00615a), 2014-01-01
Supplement: c4dt00615a1.pdf [file c4dt00615a1.pdf]

## ELECTRONIC SUPPLEMENTARY MATERIALS

### Efficient hydrolytic cleavage of plasmid DNA by chloro-cobalt(II) complexes based on sterically hindered pyridyl tripod tetraamine ligands: synthesis, crystal structure and DNA cleavage activity<sup>†</sup>

Salah S. Massoud,<sup>\*a</sup> Richard S. Perkins,<sup>a</sup> Febbee R. Louka,<sup>a</sup> Wu Xu,<sup>a</sup> Anne Le Roux,<sup>a</sup> Quentin Dutercq,<sup>a</sup> Roland C. Fischer,<sup>b</sup> Franz A. Mautner,<sup>c</sup> Makoto Handa,<sup>d</sup> Yuya Hiraoka,<sup>d</sup> Gabriel L. Kreft,<sup>e</sup> Tiago Bortolotto,<sup>e</sup> Hernán Terenzi,<sup>\*e</sup>

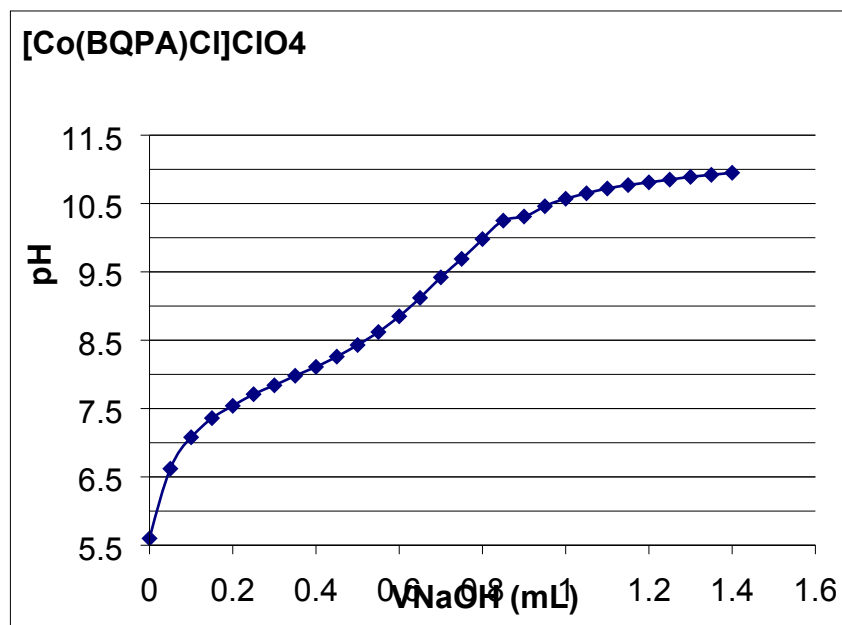

**Fig. S1.** Potentiometric pH titration of [Co(BQPA)(H<sub>2</sub>O)]<sup>2+</sup> ( $4.0 \times 10^{-3}$  M) with standard 0.05 M NaOH at 37 °C .

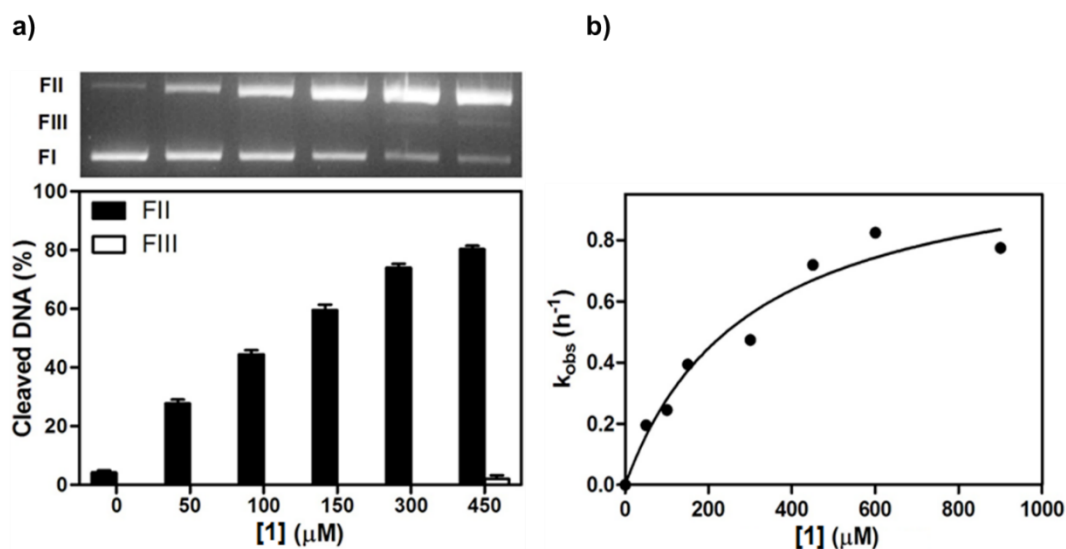

**Fig. S2. (a)** Agarose gel electrophoresis pattern and the corresponding plots for the cleavage of pBSK II plasmid DNA ( $\sim 25 \mu\text{M}$ ) by complex **1** at different complex concentrations (50-450  $\mu\text{M}$ ) at pH 7.0 Tris-HCl buffer (10 mM) and 37 °C;  $t = 2$  h. Results are expressed as mean standard deviation ( $n = 3$ ). **(b)** *Pseudo* Michaelis-Menten kinetics of the cleavage of pBSK II plasmid DNA ( $\sim 25 \mu\text{M}$ ),  $[1] = 50\text{-}900 \mu\text{M}$ , pH 7.0 Tris-HCl buffer (10 mM) and 37 °C.

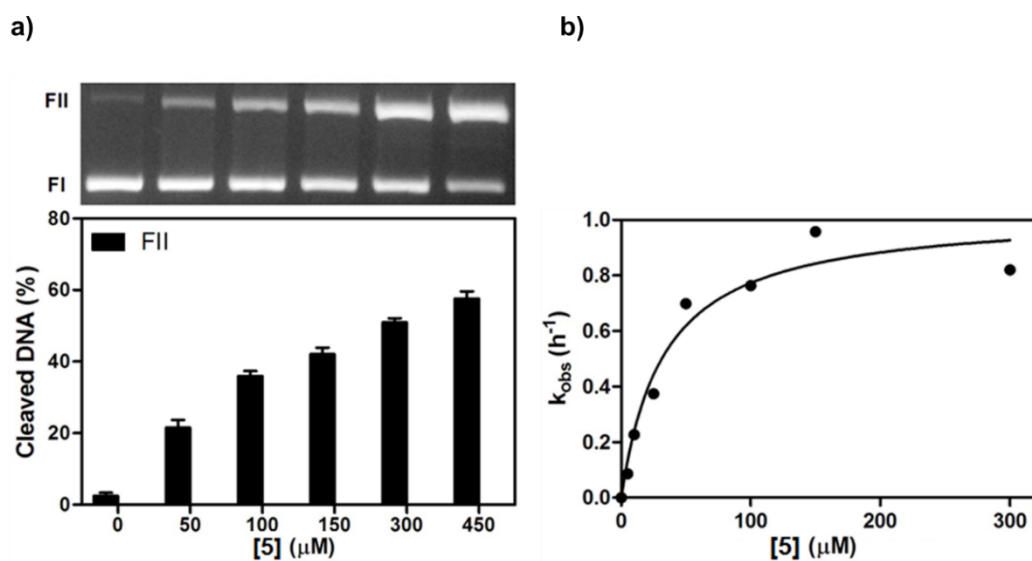

**Fig. S3. (a)** Agarose gel electrophoresis pattern and the corresponding plots for the cleavage of pBSK II plasmid DNA ( $\sim 25 \mu\text{M}$ ) by complex **5** at different complex concentrations (50-450  $\mu\text{M}$ ) at pH 7.0 Tris-HCl buffer (10 mM) and 37 °C;  $t = 2$  h. Results are expressed as mean standard deviation ( $n = 3$ ). **(b)** *Pseudo* Michaelis-Menten kinetics of the cleavage of pBSK II plasmid DNA ( $\sim 25 \mu\text{M}$ ), [5] = 5-300  $\mu\text{M}$ , pH 7.0 Tris-HCl buffer (10 mM) and 37 °C.

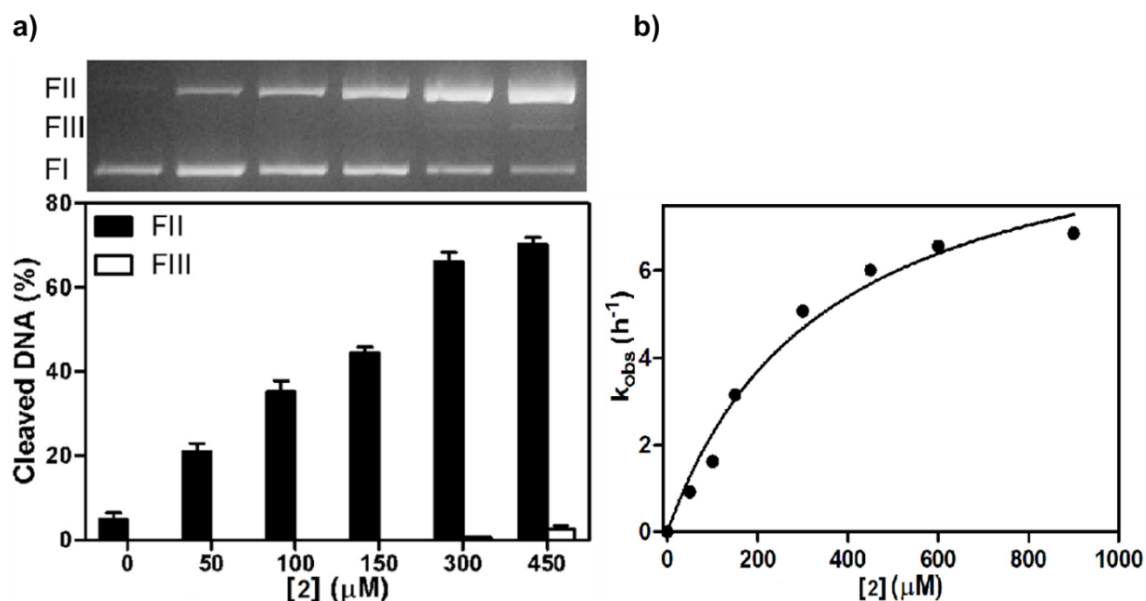

**Fig. S4.** (a) Agarose gel electrophoresis pattern and the corresponding plots for the cleavage of pBSK II plasmid DNA ( $\sim 25 \mu\text{M}$ ) by complex **2** at different complex concentrations (50-450  $\mu\text{M}$ ) at pH 9.0 Tris-HCl buffer (10 mM) and 37  $^{\circ}\text{C}$ ;  $t = 15$  min. Results are expressed as mean standard deviation ( $n = 3$ ). (b) *Pseudo* Michaelis-Menten kinetics of the cleavage of pBSK II plasmid DNA ( $\sim 25 \mu\text{M}$ ), [2] = 50-900  $\mu\text{M}$ , pH 9.0 Tris-HCl buffer (10 mM) and 37  $^{\circ}\text{C}$ .

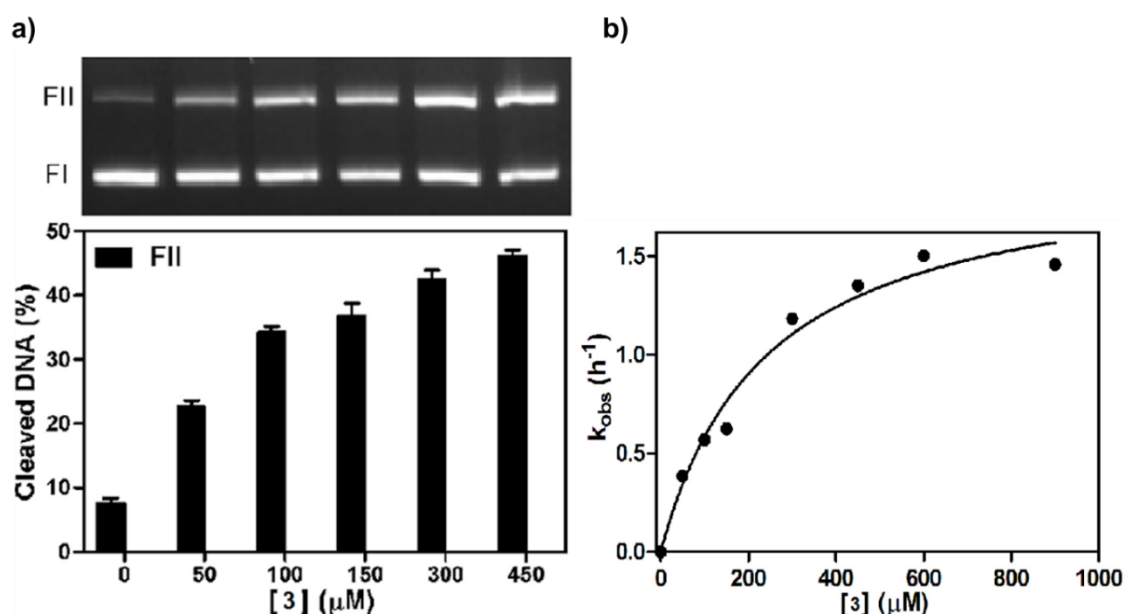

**Fig. S5.** (a) Agarose gel electrophoresis pattern and the corresponding plots for the cleavage of pBSK II plasmid DNA ( $\sim 25 \mu\text{M}$ ) by complex **3** at different complex concentrations (50-450  $\mu\text{M}$ ) at pH 9.0 Tris-HCl buffer (10 mM) and 37  $^{\circ}\text{C}$ ; time = 30 min. Results are expressed as mean standard deviation ( $n = 3$ ). (b) *Pseudo* Michaelis-Menten kinetics of the cleavage of pBSK II plasmid DNA ( $\sim 25 \mu\text{M}$ ), [2] = 50-900  $\mu\text{M}$ , pH 9.0 Tris-HCl buffer (10 mM) and 37  $^{\circ}\text{C}$ .

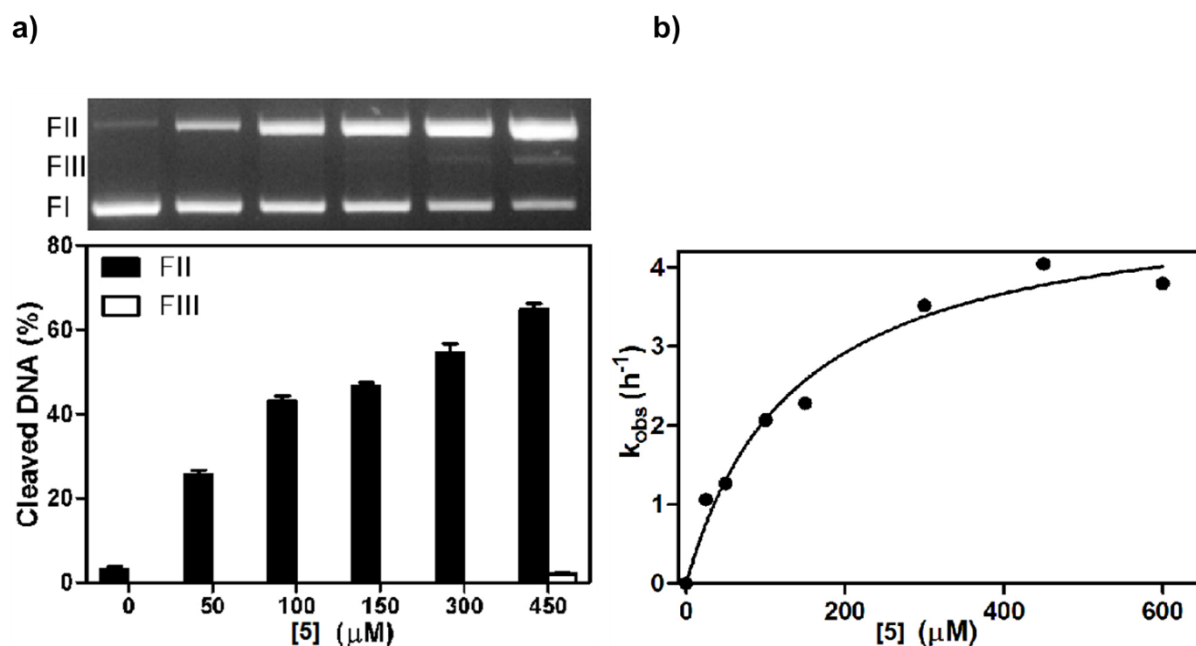

**Fig. S6. (a)** Agarose gel electrophoresis pattern and the corresponding plots for the cleavage of pBSK II plasmid DNA ( $\sim 25 \mu\text{M}$ ) by complex **5** at different complex concentrations (50-450  $\mu\text{M}$ ) at pH 9.0 Tris-HCl buffer (10 mM) and 37 °C; time = 30 min. Results are expressed as mean  $\pm$  standard deviation ( $n = 3$ ). **(b)** *Pseudo* Michaelis-Menten kinetics of the cleavage of pBSK II plasmid DNA ( $\sim 25 \mu\text{M}$ ), [5] = 50-600  $\mu\text{M}$ , pH 9.0 Tris-HCl buffer (10 mM) and 37 °C.

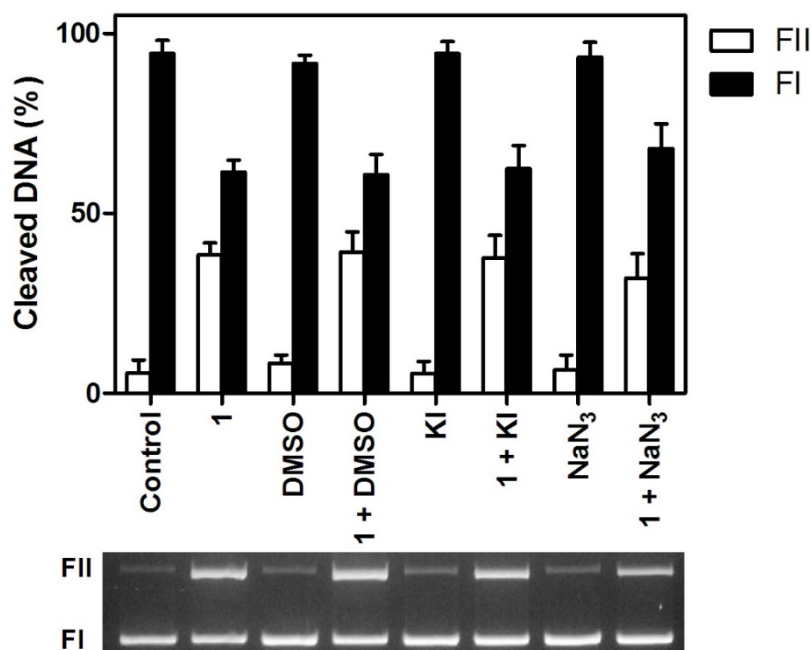

**Fig. S7.** Cleavage of pBSK II plasmid DNA ( $[DNA] = \sim 25 \mu M$ ) by **1** ( $[1] = 450 \mu M$ ) in the presence and absence of ROS scavengers. Reaction Conditions:  $[Buffer] = 10 \text{ mM Tris-HCl pH } 7.0$ ,  $37^\circ \text{C}$ ,  $t = 30 \text{ min.}$ ,  $[DMSO] = 0.5 \text{ M}$ ,  $[KI] = 0.4 \text{ mM}$ ,  $[NaN_3] = 0.5 \text{ mM}$ . Results are expressed as mean  $\pm$  standard deviation ( $n = 3$ ).

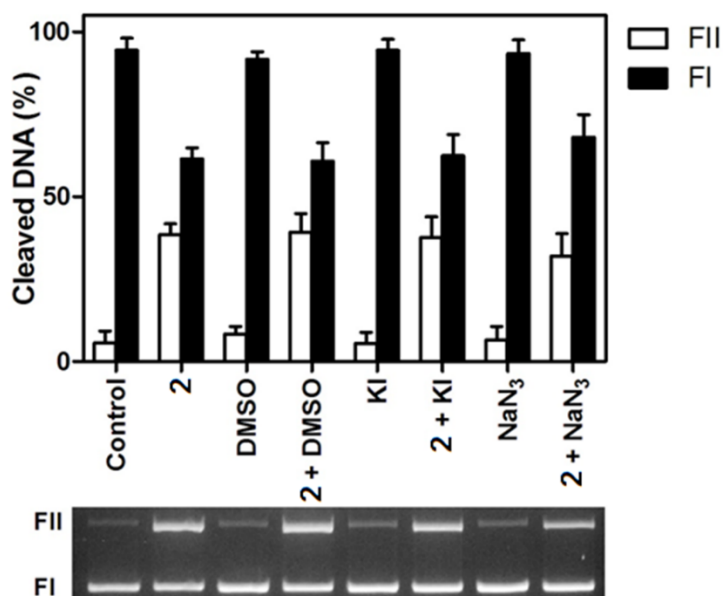

**Fig. S8.** Cleavage of pBSK II plasmid DNA ( $\sim 25 \mu M$ ) by **2** ( $450 \mu M$ ) in the presence and absence of ROS scavengers. Reaction Conditions:  $[Buffer] = 10 \text{ mM Tris-HCl pH } 7.0$ ,  $37^\circ \text{C}$ ,  $t = 30 \text{ min.}$ ,  $[DMSO] = 0.5 \text{ M}$ ,  $[KI] = 0.4 \text{ mM}$ ,  $[NaN_3] = 0.5 \text{ mM}$ . Results are expressed as mean  $\pm$  standard deviation ( $n = 3$ ).

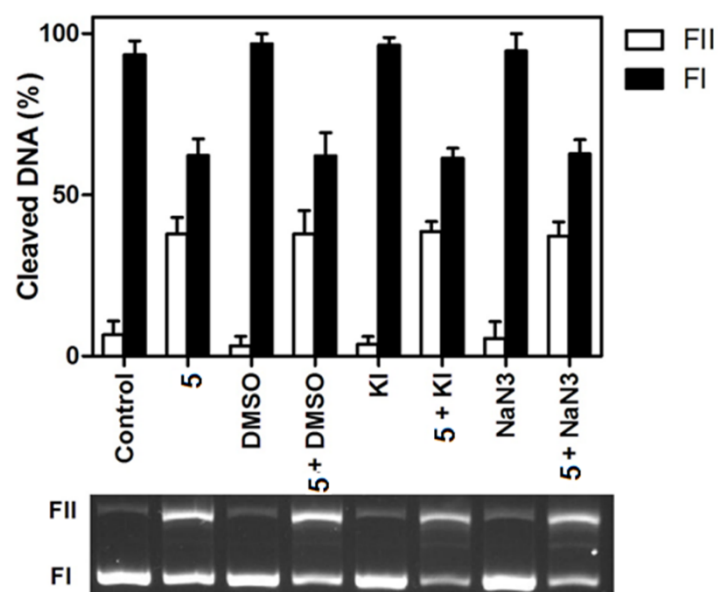

**Fig. S9.** Cleavage of pBSK II plasmid DNA ( $\sim 25 \mu\text{M}$ ) by **5** ( $450 \mu\text{M}$ ) in the presence and absence of ROS scavengers. Reaction Conditions: [Buffer] = 10 mM Tris-HCl pH 7.0,  $37^\circ\text{C}$ ,  $t = 30 \text{ min}$ , [DMSO] = 0.5 M, [KI] = 0.4 mM, [NaN<sub>3</sub>] = 0.5 mM. Results are expressed as mean  $\pm$  standard deviation ( $n = 3$ ).





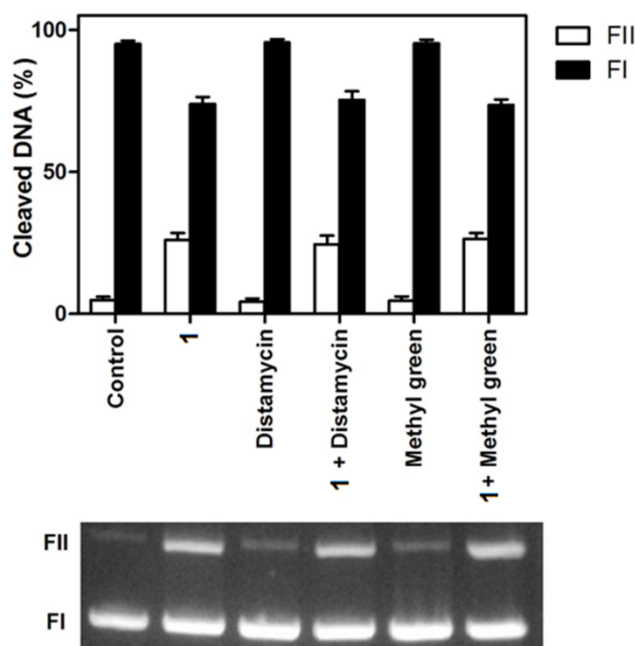

**Fig. S11.** Cleavage of pBSK II plasmid DNA (~25 μM) by **1** (450 μM) in the presence of DNA groove binders distamycin and methyl green (MG) [Distamycin or MG] = 50 μM. Reaction Conditions: [Buffer] = 10 mM Tris-HCl pH 7.0, 37 °C, t = 30 min. Results are expressed as mean ± standard deviation (n = 3).

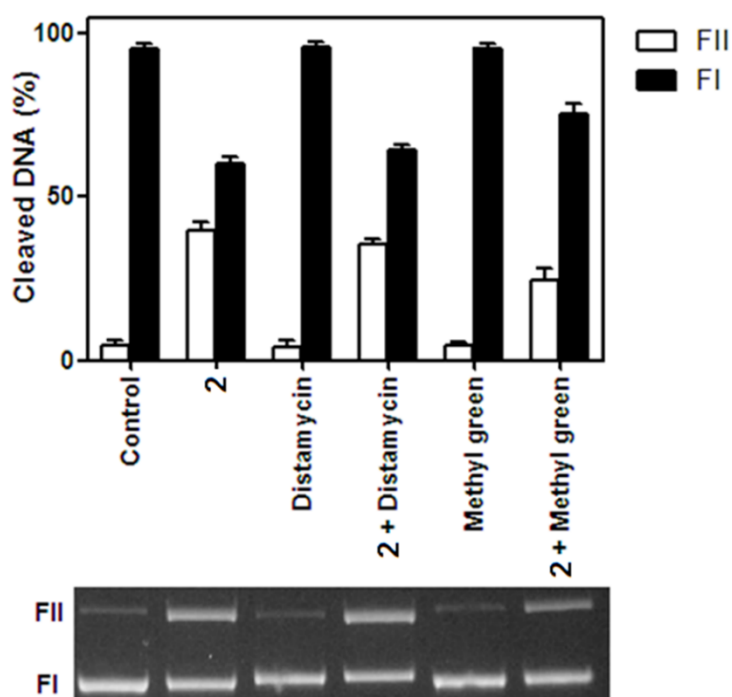

**Fig. S12.** Cleavage of pBSK II plasmid DNA (~25 μM) by **2** (450 μM) in the presence of DNA groove binders distamycin and methyl green (MG) [Distamycin or MG] = 50 μM. Reaction Conditions: [Buffer] = 10 mM Tris-HCl pH 7.0, 37 °C, t = 30 min. Results are expressed as mean ± standard deviation (n = 3).

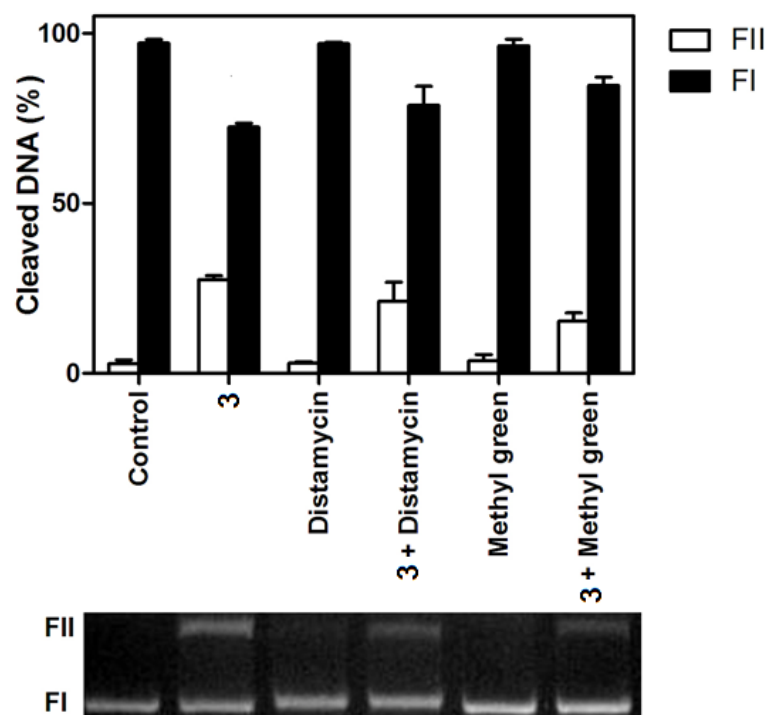

**Fig. S13.** Cleavage of pBSK II plasmid DNA ( $\sim 25 \mu\text{M}$ ) by **3** ( $450 \mu\text{M}$ ) in the presence of DNA groove binders distamycin and methyl green (MG) [Distamycin or MG] =  $50 \mu\text{M}$ ). Reaction Conditions: [Buffer] = 10 mM Tris-HCl pH 7.0,  $37^\circ\text{C}$ ,  $t = 30 \text{ min}$ . Results are expressed as mean  $\pm$  standard deviation ( $n = 3$ ).

**Table S1.** *Pseudo*-Michael-Menten Kinetics of pBSK II Plasmid DNA Cleavage by Chloro-cobalt(II) Complexes **1-5** at Different Complex Concentrations, [DNA]  $\approx$  25  $\mu$ M, [buffer] = 10 mM Tris-HCl pH 9.0 and 37  $^{\circ}$ C.

| Complex                                                    | [Co(II)] ( $\mu$ M) | $k_{obs}$ ( $h^{-1}$ ) | $k_{cat}$ ( $h^{-1}$ ) <sup>a)</sup> | $K_M$ (M)             |
|------------------------------------------------------------|---------------------|------------------------|--------------------------------------|-----------------------|
| [Co(TPA)Cl]ClO <sub>4</sub> ( <b>1</b> )                   | 5                   | 0.232                  | 3.02                                 | $3.64 \times 10^{-5}$ |
|                                                            | 10                  | 0.732                  |                                      |                       |
|                                                            | 15                  | 0.810                  |                                      |                       |
|                                                            | 30                  | 1.41                   |                                      |                       |
|                                                            | 50                  | 1.78                   |                                      |                       |
|                                                            | 100                 | 2.17                   |                                      |                       |
|                                                            | 150                 | 2.43                   |                                      |                       |
| [Co(6-MeTPA)Cl]ClO <sub>4</sub> ( <b>2</b> )               | 50                  | 0.924                  | 10.1                                 | $3.47 \times 10^{-4}$ |
|                                                            | 100                 | 1.62                   |                                      |                       |
|                                                            | 150                 | 3.15                   |                                      |                       |
|                                                            | 300                 | 5.08                   |                                      |                       |
|                                                            | 450                 | 6.02                   |                                      |                       |
|                                                            | 600                 | 6.56                   |                                      |                       |
|                                                            | 900                 | 6.86                   |                                      |                       |
| [Co(6-Me <sub>2</sub> TPA)Cl]ClO <sub>4</sub> ( <b>3</b> ) | 50                  | 0.385                  | 1.99                                 | $2.40 \times 10^{-4}$ |
|                                                            | 100                 | 0.569                  |                                      |                       |
|                                                            | 150                 | 0.624                  |                                      |                       |
|                                                            | 300                 | 1.18                   |                                      |                       |
|                                                            | 450                 | 1.35                   |                                      |                       |
|                                                            | 600                 | 1.50                   |                                      |                       |
|                                                            | 900                 | 1.46                   |                                      |                       |
| [Co(BPQA)Cl]ClO <sub>4</sub> ( <b>4</b> )                  | 50                  | 2.61                   | 16.8                                 | $3.65 \times 10^{-4}$ |
|                                                            | 100                 | 3.89                   |                                      |                       |
|                                                            | 150                 | 5.09                   |                                      |                       |
|                                                            | 300                 | 6.66                   |                                      |                       |
|                                                            | 450                 | 9.72                   |                                      |                       |
|                                                            | 600                 | 10.2                   |                                      |                       |
|                                                            | 900                 | 12.3                   |                                      |                       |
| [Co(BQPA)Cl]ClO <sub>4</sub> ( <b>5</b> )                  | 25                  | 1.06                   | 4.92                                 | $1.37 \times 10^{-4}$ |
|                                                            | 50                  | 1.27                   |                                      |                       |
|                                                            | 100                 | 2.07                   |                                      |                       |
|                                                            | 150                 | 2.28                   |                                      |                       |
|                                                            | 300                 | 3.52                   |                                      |                       |
|                                                            | 450                 | 4.04                   |                                      |                       |
|                                                            | 600                 | 3.79                   |                                      |                       |

a)  $k_{cat}$  represents the maximum rate of cleavage at the saturation ( $V_{max} = k_{cat}$ )
